# Supplementary material for: Preventive Potential of Resveratrol in Carcinogen-Induced Rat Thyroid Tumorigenesis
Source: PubMed Central journal article supplement (PMC5872697; doi:10.3390/nu10030279), 2018-02-28
Supplement: nutrients-10-00279-s001.pdf [file nutrients-10-00279-s001.pdf]

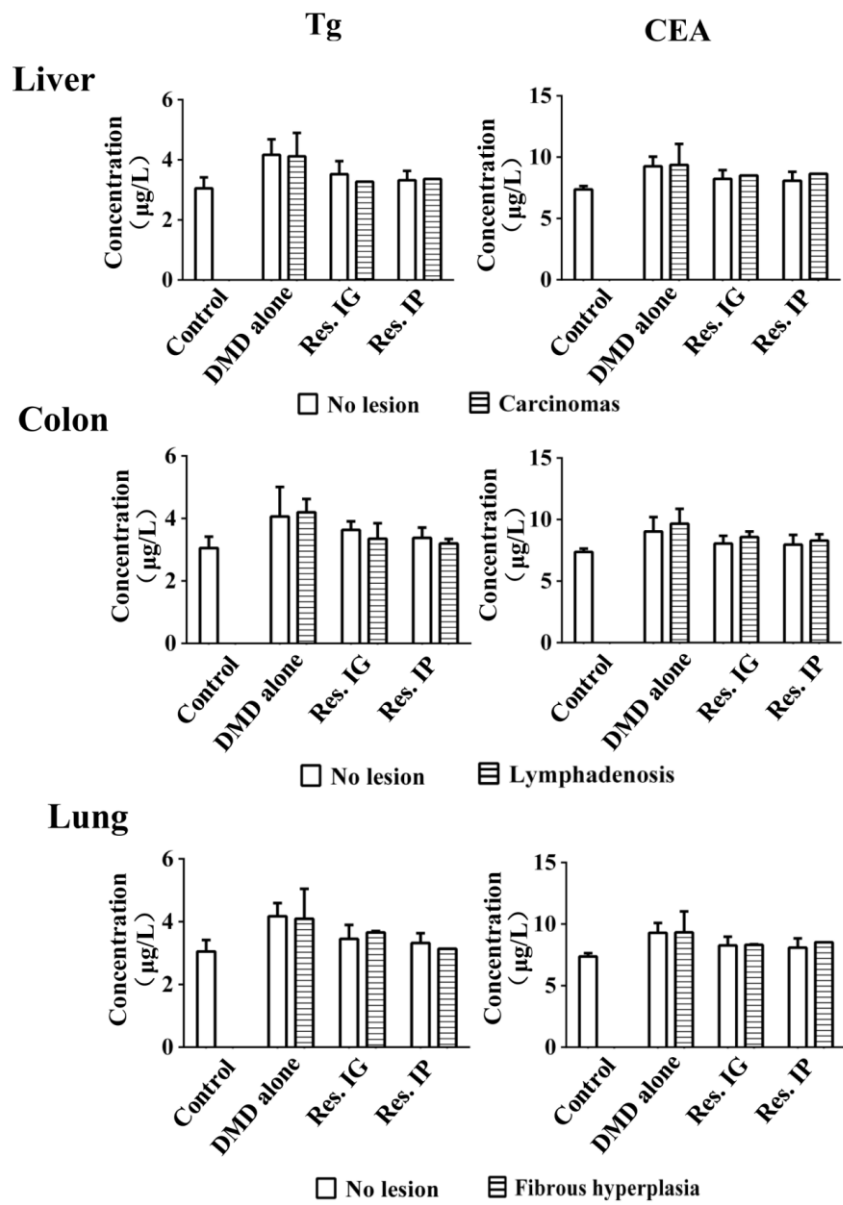

**Figure S1:** ELISA evaluation of serum Tg and CEA levels in the rats of the four experimental groups without and with pathological alterations in the liver, colon, and lungs.
